# Supplementary material
Source: PubMed Central journal article supplement (PMC3323898)
Supplement: neo1403_0206SD1.pdf [file neo1403_0206SD1.pdf]

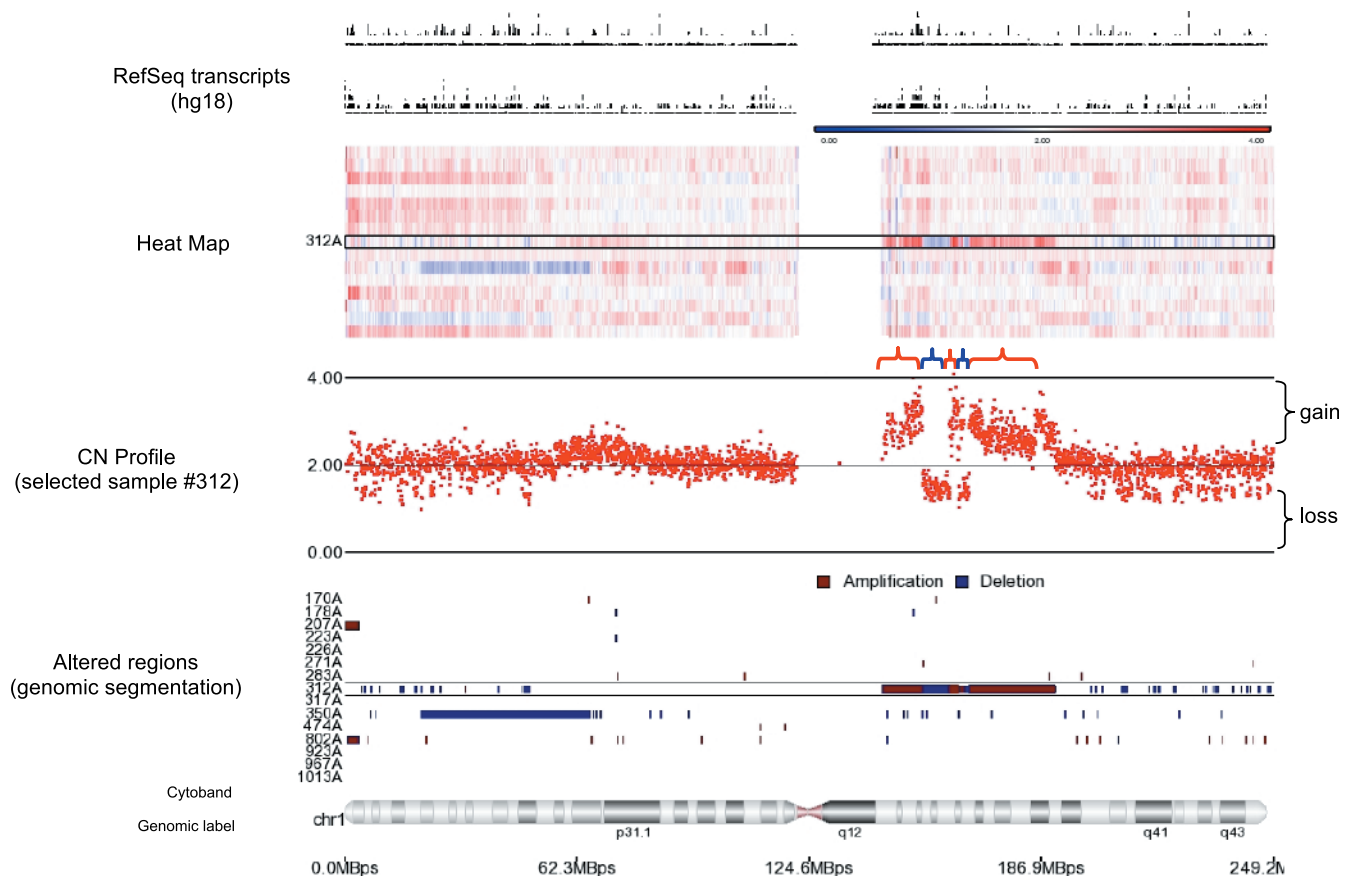

**Figure W1.** Chromosomal view of one representative chromosome (chr 1) in 15 cortisol-secreting ACA. The heat map shows the intensity plots in each sample. Gains/amplifications are represented in red and losses/deletions in blue. The CN profile is shown for one representative case (no. 312A). Normal CN score corresponds to 2.0, whereas gains correspond to a CN score greater than 2.5 and losses to a CN score less than 1.5 in blue. The genomic segmentation (Partek GS) shows the altered regions for each sample (selected case underlined). CN gains are represented in red and CN losses in blue.

**Table W1.** Primers for RT-qPCR at the DNA Level (Validation) and at the mRNA Level (Gene Expression) for the Candidate Genes and for the Internal Reference Genes.

| DNA RT-qPCR    |                   |                                       |                      |
|----------------|-------------------|---------------------------------------|----------------------|
| Gene Symbol    |                   | Primers                               | Chromosome           |
| <i>IGF2</i>    | fw                | 5'-gct gac acc tgg cgg cca tt-3'      | 11                   |
|                | rw                | 5'-ggc gtc ctg act ttg ccc cc-3'      |                      |
| <i>EPHA7</i>   | fw                | 5'-agg cct tgg cca gga agc tg-3'      | 6                    |
|                | rw                | 5'-ggc ttg cac ata tcc ctt ctg ccc-3' |                      |
| <i>SGK1</i>    | fw                | 5'-tgg aag ctg ctg ctg ccc ac-3'      | 6                    |
|                | rw                | 5'-tgt cca tct ctg gcc ccc gg-3'      |                      |
| <i>CTNNB1</i>  | fw                | 5'-acg agg agg caa grt tct cca agg-3' | 3                    |
|                | rw                | 5'-tgc gcc tct ccc cac ctc ac-3'      |                      |
| <i>CYP11B2</i> | fw                | 5'-cct gtg tct tgg ggc gg-3'          | 8                    |
|                | rw                | 5'-ggc ctt ggg cga cag cac at-3'      |                      |
| <i>GAPDH</i>   | fw                | 5'-tga cgc tgg ggc tgg cat tg-3'      | 12                   |
|                | rw                | 5'-ggc ggc aga ccc tgc act tt-3'      |                      |
| RNA RT-qPCR    |                   |                                       |                      |
| Gene Symbol    | Primer Probe Mix* | Chromosome                            | Amplicon Length (bp) |
| <i>IGF2</i>    | Hs00171254_m1     | 11                                    | 94                   |
| <i>EPHA7</i>   | Hs01033009_m1     | 6                                     | 88                   |
| <i>SGK1</i>    | Hs00178612_m1     | 6                                     | 81                   |
| <i>CTNNB1</i>  | Hs00994404_g1     | 3                                     | 93                   |
| <i>FHIT</i>    | Hs00179987_m1     | 3                                     | 79                   |
| <i>NOTCH1</i>  | Hs01062014_m1     | 9                                     | 80                   |
| <i>CYP11B1</i> | Hs01596404_m1     | 8                                     | 137                  |
| <i>CYP11B2</i> | Hs01597732_m1     | 8                                     | 137                  |
| <i>HRAS</i>    | Hs00610483_m1     | 11                                    | 69                   |
| <i>β-actin</i> | Hs9999903_m1      | 7                                     | 171                  |

\*TaqMan Gene Expression Assays (Applied Biosystems).

**Table W4.** Gene Ontology Family Analysis (Performed with GSEA) Including the Genes with CNAs Observed in at Least 2 of 15 Cortisol-Secreting ACAs (Frequency,  $\geq 13\%$ ; Total, 638 Recognized Genes).

| Cytokines and Growth Factors | Transcriptional Factors | Homeodomain Proteins | Cell Differentiation Markers | Protein Kinases      | Oncogenes            | Tumor Suppressor Genes |
|------------------------------|-------------------------|----------------------|------------------------------|----------------------|----------------------|------------------------|
| <i>CTGF</i>                  | <i><u>IRX4</u></i>      | <i><u>IRX4</u></i>   | <i><b>CD151</b></i>          | <i><b>ADCK5</b></i>  | <i><u>CTNNB1</u></i> | <i><b>FANCA</b></i>    |
| <i>IGF2</i>                  | <i><b>LHX3</b></i>      | <i><b>LHX3</b></i>   | <i>CD24</i>                  | <i>BRSK2</i>         | <i>DUX4</i>          | <i>RECQL4</i>          |
| <i>INS</i>                   | <i>NKX6-2</i>           | <i>NKX6-2</i>        | <i>IFITM1</i>                | <i><u>CAMK2B</u></i> | <i><b>HRAS</b></i>   | <i>TSC2</i>            |
| <i>INS-IGF2</i>              | <i>TGIF1</i>            | <i>TGIF1</i>         | <i>IL9R</i>                  | <i>CDK10</i>         | <i><b>NOTCH1</b></i> | <i><u>FHIT</u></i>     |
| <i>KITLG</i>                 | <i>VENTX</i>            | <i>TGIF2LY</i>       | <i><b>L1CAM</b></i>          | <i>CDK11A</i>        | <i>PRDM16</i>        | <i><u>H19</u></i>      |
| <i>PDGFA</i>                 | <i><u>CTNNB1</u></i>    | <i><b>UNCX</b></i>   | <i>RHCE</i>                  | <i><u>EPHA7</u></i>  | <i><u>STIL</u></i>   |                        |
| <i>SCT</i>                   | <i>DUX4</i>             | <i>VENTX</i>         | <i>TNFRSF4</i>               | <i>EPHB2</i>         |                      |                        |
| <i>SLURP1</i>                | <i>PRDM16</i>           |                      |                              | <i><b>IRAK1</b></i>  |                      |                        |
|                              | <i>ARC</i>              |                      |                              | <i><b>MAPK15</b></i> |                      |                        |
|                              | <i>DEAF1</i>            |                      |                              | <i>NRBP2</i>         |                      |                        |
|                              | <i>E2F2</i>             |                      |                              | <i>PRKCZ</i>         |                      |                        |
|                              | <i>E4F1</i>             |                      |                              | <i><u>PRKG1</u></i>  |                      |                        |
|                              | <i>FAM20C</i>           |                      |                              | <i>PRKY</i>          |                      |                        |
|                              | <i><b>FOXH1</b></i>     |                      |                              | <i>PTK2</i>          |                      |                        |
|                              | <i>HES4</i>             |                      |                              | <i><u>SGK1</u></i>   |                      |                        |
|                              | <i>HES5</i>             |                      |                              |                      |                      |                        |
|                              | <i><u>HEY2</u></i>      |                      |                              |                      |                      |                        |
|                              | <i><b>HSF1</b></i>      |                      |                              |                      |                      |                        |
|                              | <i>HSFY1</i>            |                      |                              |                      |                      |                        |
|                              | <i>ID3</i>              |                      |                              |                      |                      |                        |
|                              | <i><b>IRF7</b></i>      |                      |                              |                      |                      |                        |
|                              | <i><b>LRRC14</b></i>    |                      |                              |                      |                      |                        |
|                              | <i><b>MAFK</b></i>      |                      |                              |                      |                      |                        |
|                              | <i><b>MECP2</b></i>     |                      |                              |                      |                      |                        |
|                              | <i><b>MFSB3</b></i>     |                      |                              |                      |                      |                        |
|                              | <i>NFKBIL2</i>          |                      |                              |                      |                      |                        |
|                              | <i>NPAS2</i>            |                      |                              |                      |                      |                        |
|                              | <i><b>PHRF1</b></i>     |                      |                              |                      |                      |                        |
|                              | <i><b>PRDM7</b></i>     |                      |                              |                      |                      |                        |
|                              | <i>RASSF7</i>           |                      |                              |                      |                      |                        |
|                              | <i><u>REV3L</u></i>     |                      |                              |                      |                      |                        |
|                              | <i>RXRA</i>             |                      |                              |                      |                      |                        |
|                              | <i>SCRT1</i>            |                      |                              |                      |                      |                        |
|                              | <i>SNAPC4</i>           |                      |                              |                      |                      |                        |
|                              | <i>SOX8</i>             |                      |                              |                      |                      |                        |
|                              | <i>SRY</i>              |                      |                              |                      |                      |                        |
|                              | <i>TBL1Y</i>            |                      |                              |                      |                      |                        |
|                              | <i>TP73</i>             |                      |                              |                      |                      |                        |
|                              | <i>TRIP13</i>           |                      |                              |                      |                      |                        |
|                              | <i>UTF1</i>             |                      |                              |                      |                      |                        |
|                              | <i>ZFY</i>              |                      |                              |                      |                      |                        |
|                              | <i>ZNF16</i>            |                      |                              |                      |                      |                        |
|                              | <i>ZNF250</i>           |                      |                              |                      |                      |                        |
|                              | <i>ZNF251</i>           |                      |                              |                      |                      |                        |
|                              | <i>ZNF33B</i>           |                      |                              |                      |                      |                        |
|                              | <i>ZNF696</i>           |                      |                              |                      |                      |                        |
|                              | <i>ZNF7</i>             |                      |                              |                      |                      |                        |

Red: genes with CN gains

Blue: genes with CN losses.

Underlined: genes with microalterations.

**Bold:** genes altered in at least three samples (frequency,  $\geq 20\%$ ).

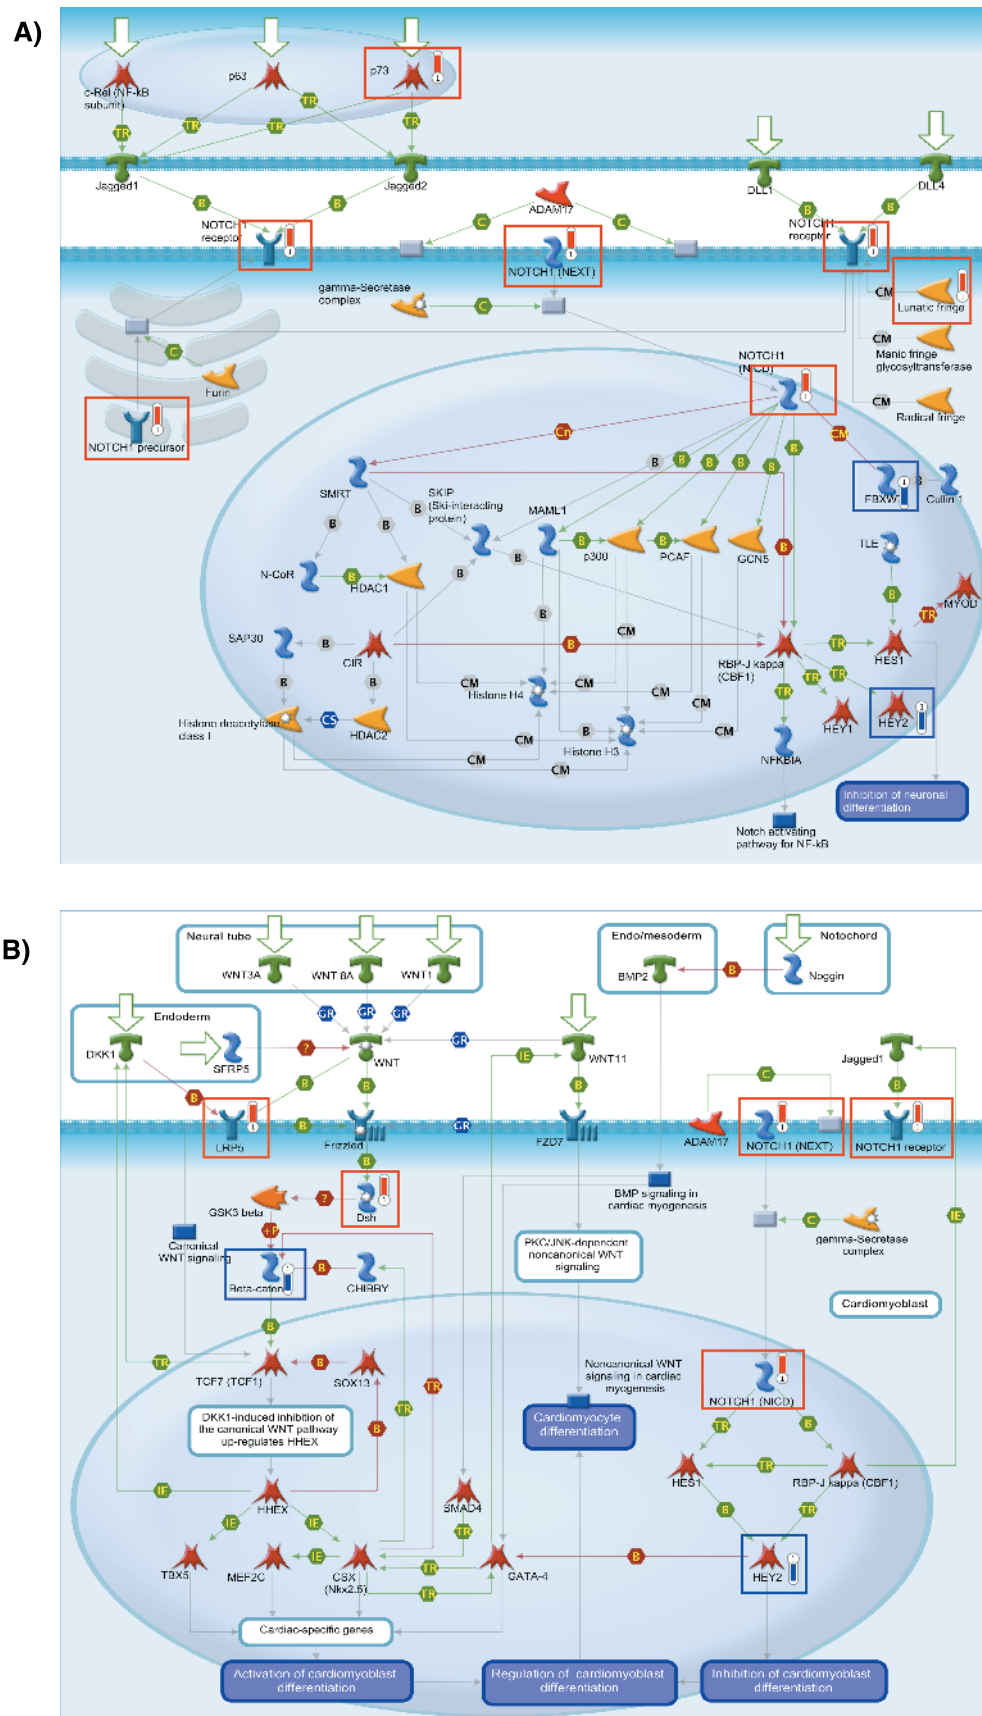

**Figure W2.** The Notch signaling pathway map (A, gene ontology enrichment  $P = 1.494e^{-6}$ ) and the Wnt and Notch signaling in early cardiac myogenesis (B, gene ontology enrichment,  $P = 4.287e^{-6}$ ) according to the GeneGo analysis (MetaCore Analytical suite) including all the genes ( $n = 285$  annotated genes) with CNAs observed in at least two samples (recurrent CNA). Genes with gains are underlined in red and genes with losses in blue. Detailed legend is available at <http://www.genego.com/mapsearch.php>.

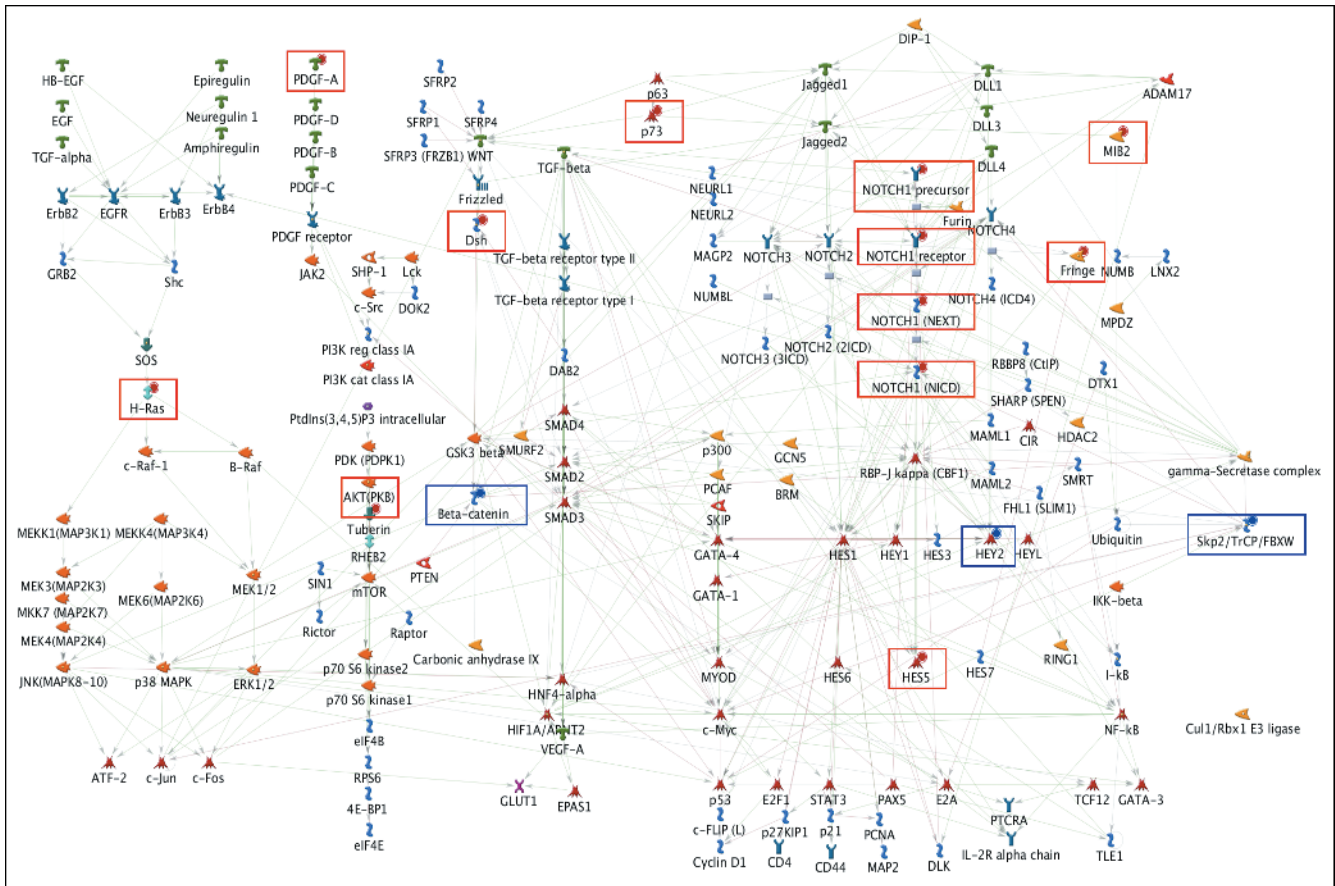

**Figure W3.** The entire Notch signaling gene network according to the GeneGo analysis (MetaCore Analytical suite). Detailed legend is available at <http://www.genego.com/mapsearch.php>.

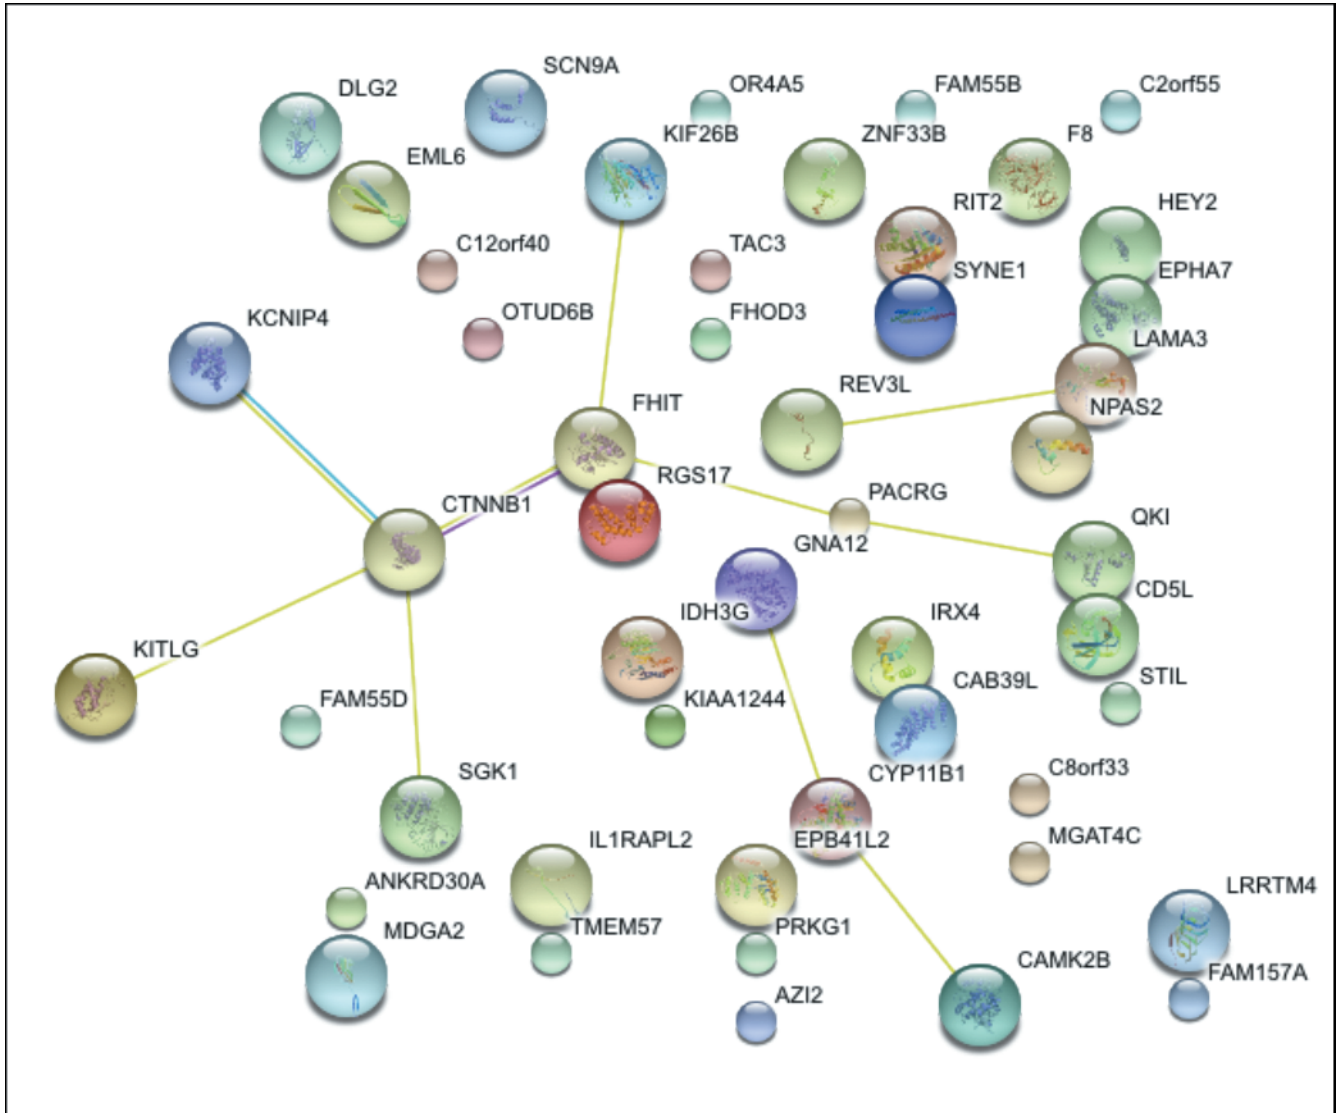

**Figure W4.** Graphical representation of the STRING-generated protein-protein network (action view) for the single genes with CN micro-alterations observed in at least two samples ( $n = 46$  annotated genes). Modes of action are shown in different colors. Detailed legend is available at [http://string-db.org/newstring.cgi/show\\_network\\_section](http://string-db.org/newstring.cgi/show_network_section).
